# Supplementary material for: Risk of COVID-19 death in adults who received booster COVID-19 vaccinations in England
Source: PubMed Central journal article supplement (PMC10791661; doi:10.1038/s41467-023-44276-x), 2024-01-16
Supplement: 41467_2023_44276_MOESM1_ESM.pdf [file 41467_2023_44276_MOESM1_ESM.pdf]

## Supplementary

### Supplementary Figure 1

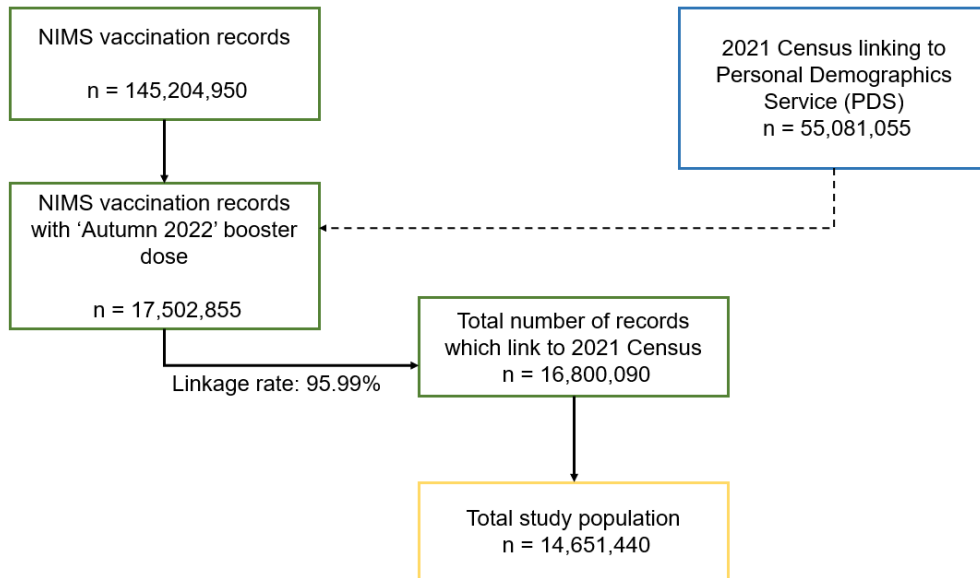

Population diagram: *Sample flow diagram detailing derivation of study population with counts (n) shown rounded to the nearest 5.*

**Supplementary Table 1 – Population sample flow**

| <b>Stage</b>                                                                                                                                            | <b>Total population</b> |
|---------------------------------------------------------------------------------------------------------------------------------------------------------|-------------------------|
| Total 2021 Census linking to Personal Demographics Service (PDS)                                                                                        | 55,081,055              |
| Total number of NIMS records                                                                                                                            | 145,204,950             |
| Total number of NIMS records with autumn 2022 dose                                                                                                      | 17,502,855              |
| Total number of NIMS records with autumn 2022 dose which link to 2021 Census                                                                            | 16,800,090              |
| Total population who were usual residents at time of 2021 Census                                                                                        | 16,777,280              |
| Total population aged 50 to 100 years of age on vaccination date and alive on 1 September 2022                                                          | 14,657,455              |
| Total people with positive time at risk (time between 14 days after vaccination and the earliest of end of study (11 April 2023) date or date of death) | 14,651,440              |

**Supplementary Table 2** – Z-statistics estimates for health predictors from bootstrapped estimates

| <b>Category</b>                                                          | <b>Z-statistic</b> |
|--------------------------------------------------------------------------|--------------------|
| Asthma                                                                   | 1.32               |
| Atrial Fibrillation                                                      | -0.32              |
| Cancer of Blood or Bone Marrow                                           | 5.96               |
| Chronic Kidney Disease                                                   | 3.06               |
| Congenital Heart Problem                                                 | -0.93              |
| Chronic obstructive pulmonary disease (COPD)                             | 0.54               |
| Coronary Heart Disease                                                   | 1.07               |
| Cystic fibrosis *                                                        | 3.47               |
| Dementia                                                                 | -7.15              |
| Diabetes: Type 1                                                         | 0.03               |
| Diabetes: Type 2                                                         | -1.02              |
| Epilepsy                                                                 | -0.69              |
| Heart Failure                                                            | 0.79               |
| Immunosuppressed                                                         | 1.26               |
| Learning Disability or Down Syndrome                                     | 1.15               |
| Prescribed leukotriene                                                   | 0.98               |
| Liver Cirrhosis                                                          | -1.86              |
| Lung or Oral Cancer                                                      | -0.04              |
| Motor neurone disease /Multiple sclerosis/Myasthenia/Huntington's/Chorea | 0.23               |
| Parkinson's Disease                                                      | 0.36               |
| Peripheral Vascular Disease                                              | -1.58              |
| Prior Fracture ***                                                       | -1.16              |
| Pulmonary Hypertension or Fibrosis                                       | 2.45               |
| Rheumatoid Arthritis or Systemic lupus erythematosus (SLE)               | 2.77               |
| Schizophrenia                                                            | 0.13               |
| Severe mental illness                                                    | 0.21               |
| Stroke **                                                                | -0.07              |
| Thrombosis or pulmonary embolus                                          | 0.34               |

\* - Cystic fibrosis, bronchiectasis or alveolitis, \*\* - Stroke or transient ischaemic attack (TIA), \*\*\* - Prior fracture of hip, wrist, spine, or humerus

**Supplementary Table 3** – Health conditions associated with COVID-19 and non-COVID-19 death from model estimates not adjusted for all other health conditions

| Category                                                                 | HR for COVID-19 death (95% CI) | HR for non-COVID-19 death (95% CI) |
|--------------------------------------------------------------------------|--------------------------------|------------------------------------|
| Asthma                                                                   | 1.21 (1.1 - 1.33)              | 1.07 (1.05 - 1.09)                 |
| Atrial Fibrillation                                                      | 1.6 (1.5 - 1.71)               | 1.58 (1.56 - 1.6)                  |
| Cancer of Blood or Bone Marrow                                           | 3.58 (3.14 - 4.07)             | 1.9 (1.83 - 1.97)                  |
| Chronic Kidney Disease                                                   | 1.55 (1.46 - 1.65)             | 1.38 (1.36 - 1.4)                  |
| Congenital Heart Problem                                                 | 1.37 (0.78 - 2.41)             | 1.59 (1.43 - 1.78)                 |
| Chronic obstructive pulmonary disease (COPD)                             | 2.51 (2.35 - 2.69)             | 2.3 (2.27 - 2.34)                  |
| Coronary Heart Disease                                                   | 1.43 (1.32 - 1.53)             | 1.33 (1.31 - 1.35)                 |
| Cystic fibrosis *                                                        | 2.5 (2.17 - 2.88)              | 1.65 (1.59 - 1.72)                 |
| Dementia                                                                 | 2.83 (2.63 - 3.04)             | 3.66 (3.61 - 3.71)                 |
| Diabetes: Type 1                                                         | 1.66 (1.48 - 1.85)             | 1.68 (1.65 - 1.72)                 |
| Diabetes: Type 2                                                         | 1.46 (1.37 - 1.55)             | 1.51 (1.49 - 1.53)                 |
| Epilepsy                                                                 | 1.81 (1.41 - 2.33)             | 2.05 (1.95 - 2.15)                 |
| Heart Failure                                                            | 2.34 (2.18 - 2.52)             | 2.19 (2.15 - 2.23)                 |
| Immunosuppressed                                                         | 2.62 (2.34 - 2.93)             | 1.88 (1.83 - 1.93)                 |
| Learning Disability or Down Syndrome                                     | 5.49 (4 - 7.53)                | 4.72 (4.42 - 5.04)                 |
| Prescribed leukotriene                                                   | 1.79 (1.69 - 1.89)             | 1.61 (1.59 - 1.63)                 |
| Liver Cirrhosis                                                          | 3.52 (2.6 - 4.77)              | 4.48 (4.23 - 4.73)                 |
| Lung or Oral Cancer                                                      | 3.82 (3.03 - 4.8)              | 3.66 (3.48 - 3.84)                 |
| Motor neurone disease /Multiple sclerosis/Myasthenia/Huntington's/Chorea | 3.44 (2.14 - 5.54)             | 3.15 (2.84 - 3.5)                  |
| Parkinson's Disease                                                      | 3.08 (2.64 - 3.59)             | 3.18 (3.08 - 3.29)                 |
| Peripheral Vascular Disease                                              | 1.85 (1.61 - 2.13)             | 2 (1.94 - 2.06)                    |
| Prior Fracture ***                                                       | 1.37 (0.95 - 1.97)             | 1.62 (1.51 - 1.74)                 |
| Pulmonary Hypertension or Fibrosis                                       | 4.09 (3.46 - 4.83)             | 2.9 (2.78 - 3.03)                  |
| Rheumatoid Arthritis or Systemic lupus erythematosus (SLE)               | 2.26 (1.95 - 2.62)             | 1.52 (1.47 - 1.58)                 |
| Schizophrenia                                                            | 2.5 (1.89 - 3.31)              | 2.45 (2.31 - 2.6)                  |
| Severe mental illness                                                    | 1.67 (1.52 - 1.83)             | 1.66 (1.63 - 1.69)                 |
| Stroke **                                                                | 1.56 (1.43 - 1.7)              | 1.6 (1.58 - 1.63)                  |
| Thrombosis or pulmonary embolus                                          | 2.53 (0.82 - 7.85)             | 1.97 (1.49 - 2.59)                 |

\* - Cystic fibrosis, bronchiectasis or alveolitis, \*\* - Stroke or transient ischaemic attack (TIA), \*\*\* - Prior fracture of hip, wrist, spine, or humerus
