# Supplementary material for: Risk of COVID-19 death in adults who received booster COVID-19 vaccinations in England
Source: PubMed Central journal article supplement (PMC10791661; doi:10.1038/s41467-023-44276-x), 2024-01-16
Supplement: 41467_2023_44276_MOESM3_ESM.pdf [file 41467_2023_44276_MOESM3_ESM.pdf]

## Description of Additional Supplementary files

**Supplementary Data 1:** Characteristics of the study population, predictor groupings and deaths

\* - Cystic fibrosis, bronchiectasis or alveolitis, \*\* - Stroke or transient ischaemic attack (TIA), \*\*\* - Prior fracture of hip, wrist, spine or humerus

**Supplementary Data 2:** Sociodemographic characteristics and health conditions associated with COVID-19 and non-COVID-19 death

*Hazard ratios (HRs) were calculated with a Cox regression model which was adjusted for: **age, sex, and calendar time (Model 1), plus ethnic group (Model 2), and BMI (Model 3), and disability (Model 4) and health conditions (Model 5).***

\* - Cystic fibrosis, bronchiectasis or alveolitis, \*\* - Stroke or transient ischaemic attack (TIA), \*\*\* - Prior fracture of hip, wrist, spine or humerus
